# Supplementary material
Source: Royal Society of Chemistry journal article supplement (doi:10.1039/d6ta02274j)
Supplement: d6ta02274j1.pdf [file d6ta02274j1.pdf]

## **Supporting Information**

# **Integrating Single-Site Co Catalytic Center into Zr-MOF without Sacrificing Light-Harvesting Units for Enhanced Photocatalysis**

Hao Zhang, Tianxin Zhang, Pengxiang Dong, Zhen Fan, Cha Li, Qingfu Zhang\*, and  
Jiandong Pang\*

## **Table of Contents**

**S1. Supplementary Figures**

**S2. Supplementary Table**

## S1. Supplementary Figures

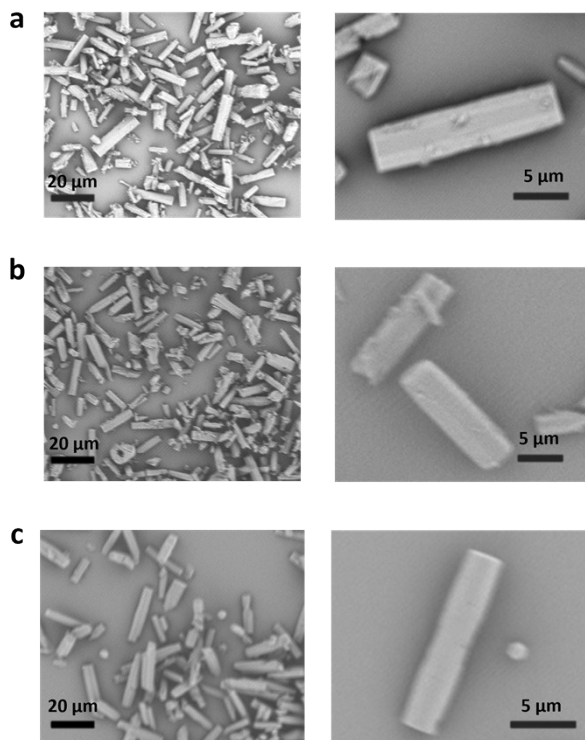

**Fig. S1** SEM images of (a) NU-1000, (b) NU-1000-NIS, and (c) NU-1000-NIS-Co. Note: The crystal morphology of NU-1000-NBDC was clearly observable during 3D ED measurements. Therefore, additional SEM characterization was not performed.

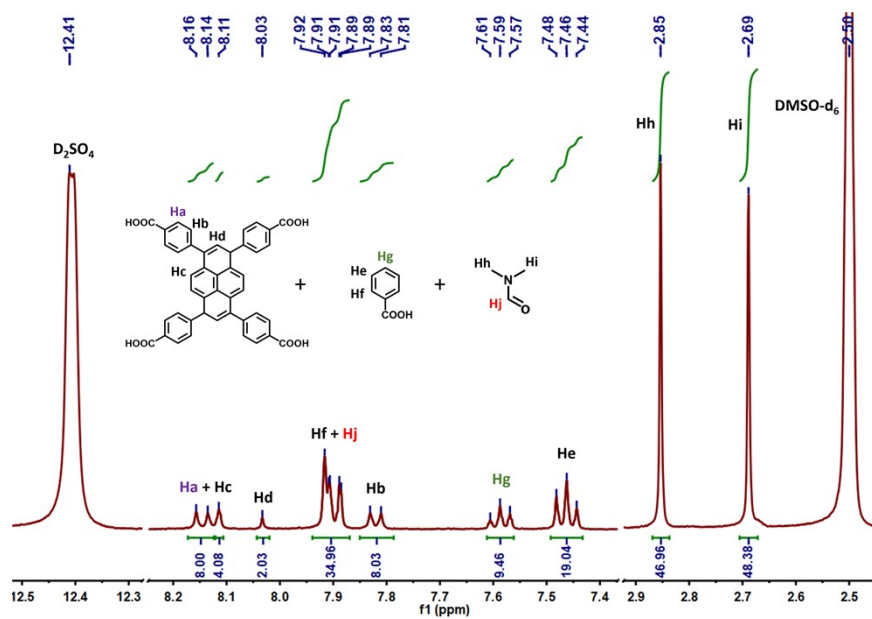

**Fig. S2** The  $^1\text{H}$ -NMR spectrum of digested NU-1000.

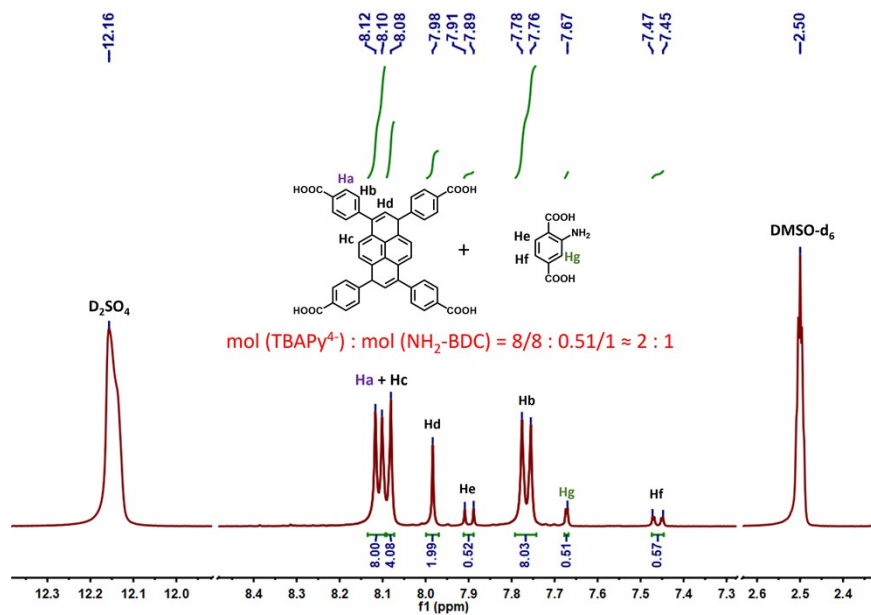

Fig. S3 The <sup>1</sup>H-NMR spectrum of digested NU-1000-NBDC.

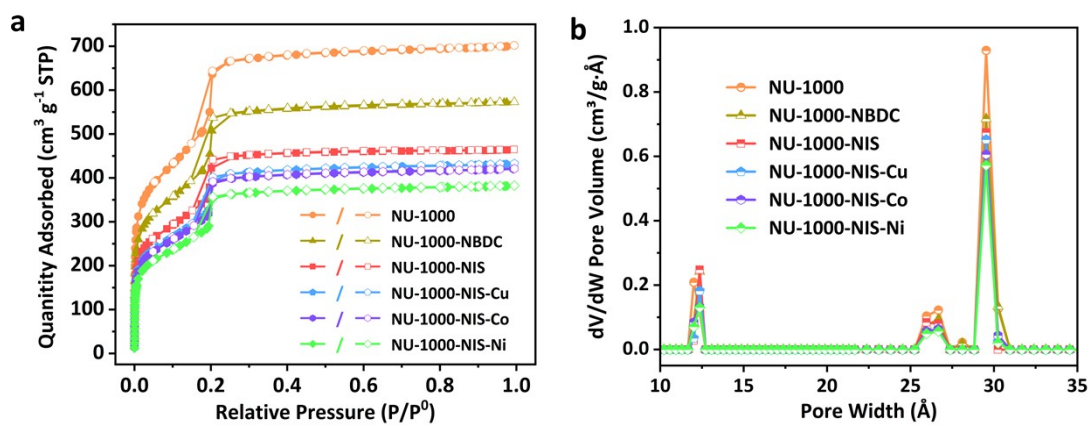

Fig. S4 The 77 K N<sub>2</sub> adsorption-desorption isotherms of NU-1000, NU-1000-NBDC, NU-1000-NIS, NU-1000-NIS-Cu, NU-1000-NIS-Co and NU-1000-NIS-Ni.

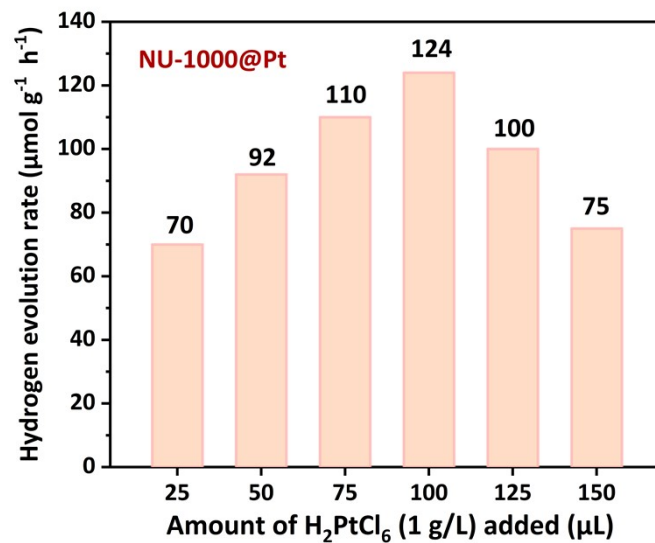

**Fig. S5** The relationship between the amount of  $H_2PtCl_6$  (1 g/L) added and the photocatalytic hydrogen evolution rate.

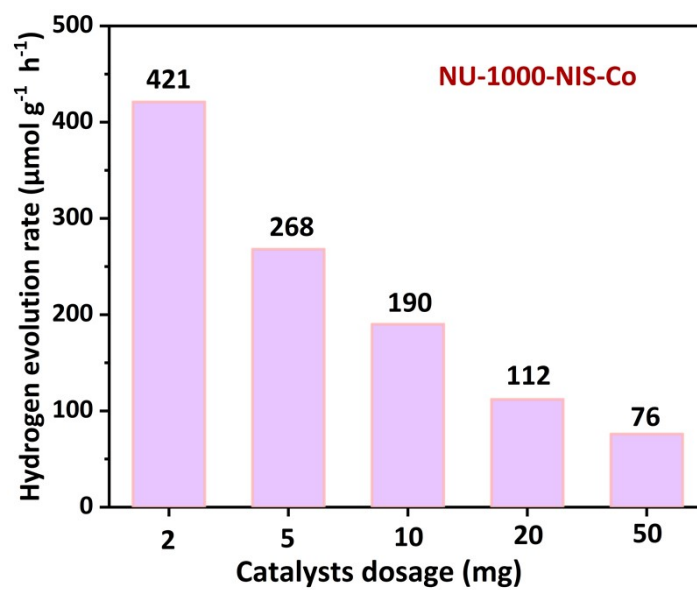

**Fig. S6** The relationship between the catalysts dosage (NU-1000-NIS-Co) and the photocatalytic hydrogen evolution rate.

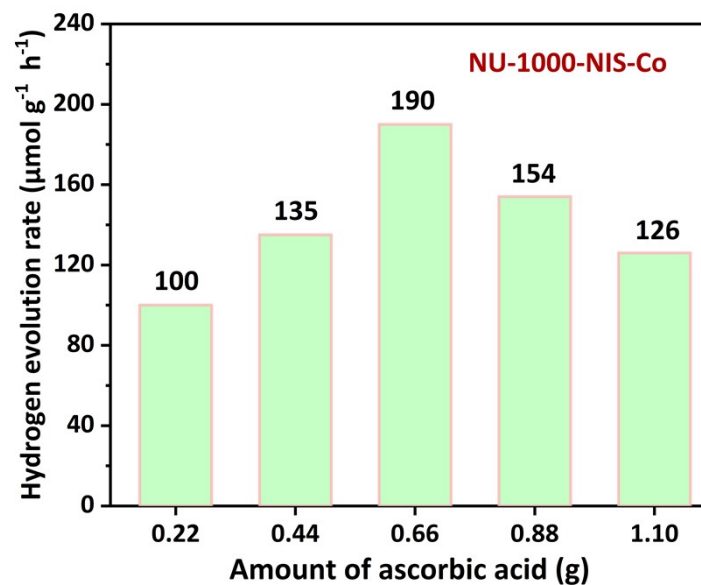

**Fig. S7** The relationship between the amount of ascorbic acid and the photocatalytic hydrogen evolution rate.

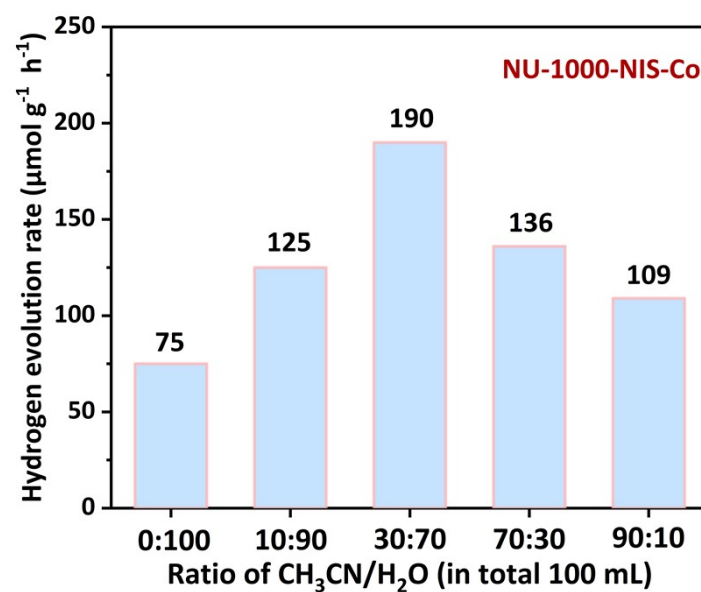

**Fig. S8** The relationship between the ratio of  $\text{CH}_3\text{CN}/\text{H}_2\text{O}$  and the photocatalytic hydrogen evolution rate.

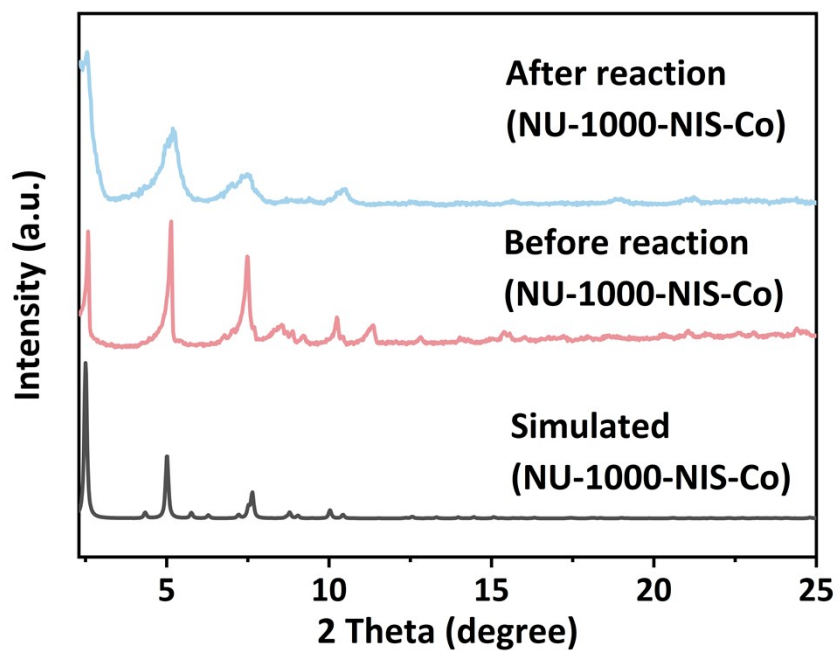

**Fig. S9** The PXR D patterns of NU-1000-NIS-Co after photocatalysis.

## S2. Supplementary Table

Table S1: Crystal data and structure refinements of NU-1000-NBDC

| Identification Code                              | NU-1000-NBDC                                                       |
|--------------------------------------------------|--------------------------------------------------------------------|
| CCDC                                             | 2537622                                                            |
| Empirical formula                                | C <sub>48</sub> H <sub>26</sub> NO <sub>16</sub> Zr <sub>3</sub>   |
| Formula weight                                   | 1146.40                                                            |
| Temperature (K)                                  | 293(2)                                                             |
| Crystal system                                   | hexagonal                                                          |
| Space group                                      | <i>P</i> -62m                                                      |
| Unit cell dimensions                             | <i>a</i> = 40.70(18) Å<br><i>c</i> = 15.33(15) Å                   |
| Volume (Å <sup>3</sup> ), <i>Z</i>               | 21989(289)                                                         |
| Density (calculated)                             | 0.519 g/cm <sup>3</sup>                                            |
| F(000)                                           | 1227.0                                                             |
| Radiation                                        | transmission electron microscope ( $\lambda = 0.0251$ )            |
| 2 $\theta$ range for data collection/ $^{\circ}$ | 0.192 to 1.798                                                     |
| Index ranges                                     | $-50 \leq h \leq 50$ , $-43 \leq k \leq 43$ , $-19 \leq l \leq 19$ |
| Reflections collected                            | 68152                                                              |
| Data/restraints/parameters                       | 15658/150/106                                                      |
| Goodness-of-fit on F <sup>2</sup>                | 1.119                                                              |
| Final R indexes [ $I \geq 2\sigma(I)$ ]          | R <sub>1</sub> = 0.2628, wR <sub>2</sub> = 0.5312                  |
| Final R indexes [all data]                       | R <sub>1</sub> = 0.4626, wR <sub>2</sub> = 0.6252                  |
| Largest diff. peak/hole / e Å <sup>-3</sup>      | 0.38/-0.32                                                         |

**Table S2.** The unit cell parameters of NU-1000, NU-1000-NBDC and NU-1000-NIS-Co.

| MOFs           | $a/\text{\AA}$ | $b/\text{\AA}$ | $c/\text{\AA}$ | $\alpha/^\circ$ | $\beta/^\circ$ | $\gamma/^\circ$ |
|----------------|----------------|----------------|----------------|-----------------|----------------|-----------------|
| NU-1000        | 39.62          | 39.62          | 16.64          | 90              | 90             | 120             |
| NU-1000-NBDC   | 40.70          | 40.70          | 15.33          | 90              | 90             | 120             |
| NU-1000-NIS-Co | 40.59          | 40.59          | 15.48          | 90              | 90             | 120             |

**Table S3.** ICP-OES results of NU-1000-NIS-Co before and after photocatalytic reaction.

| Samples                                                    | Zr (wt%) | Co (wt%) |
|------------------------------------------------------------|----------|----------|
| <b>NU-1000-NIS-Co<br/>(before photocatalytic reaction)</b> | 23.12    | 1.84     |
| <b>NU-1000-NIS-Co<br/>(after photocatalytic reaction)</b>  | 23.59    | 1.76     |
